# Supplementary material
Source: PubMed Central journal article supplement (PMC6483859)
Supplement: NIHMS1524466-supplement-1.pdf [file NIHMS1524466-supplement-1.pdf]

**A**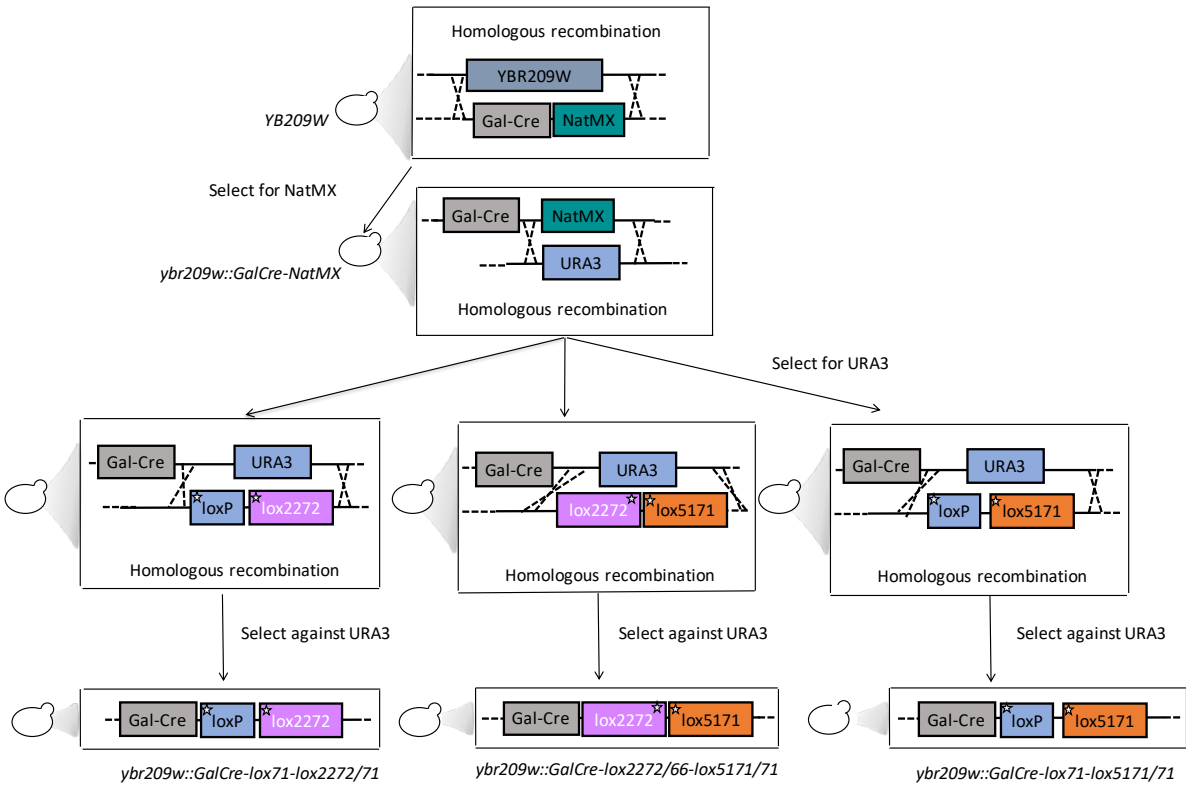**B**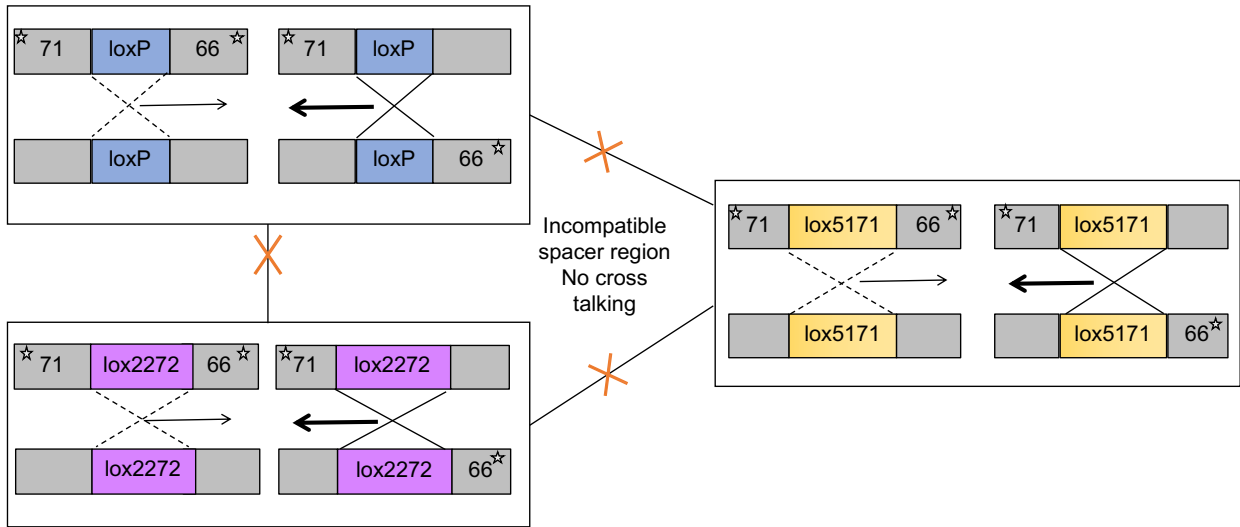**Figure S1. Related to Figure 1.**

(A) Schematic of strain construction at the *YBR209W* locus. Lines with arrows indicate selection after transformation. The sequence at the *YBR209W* locus is indicated.

(B) The *loxP* variants used in this study. Three groups of *loxP* variants, which have different “core” regions, have a low rate of recombination with each other. The stars indicate mutations in the palindromic arms. The suffixes “71” and “66” in a *loxP* variant name (e.g. *lox71* or *lox2272/66*) indicate mutations in left and right arms, respectively.

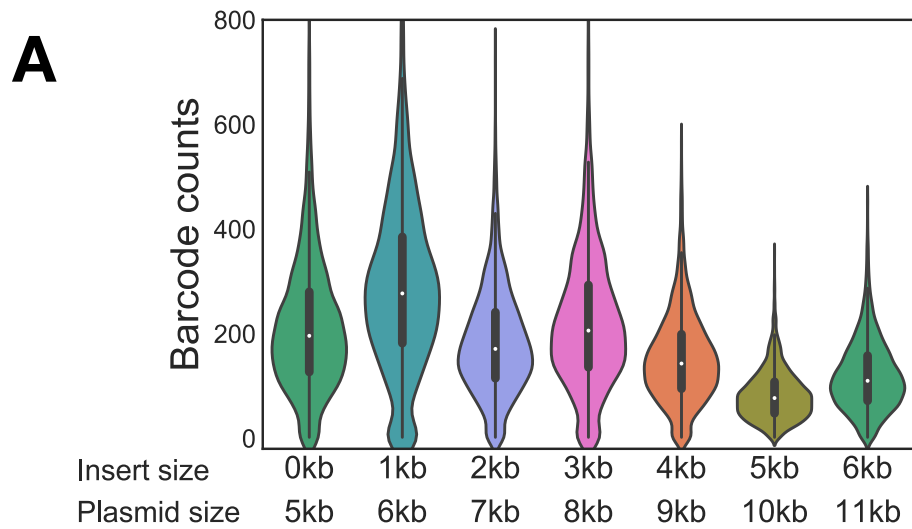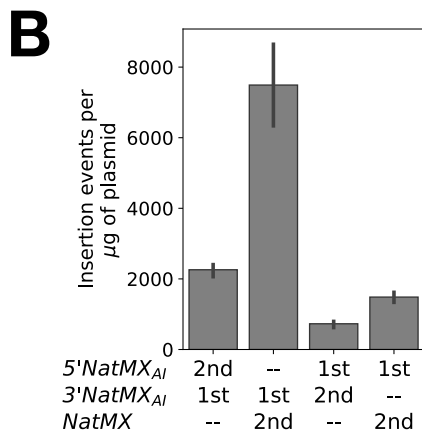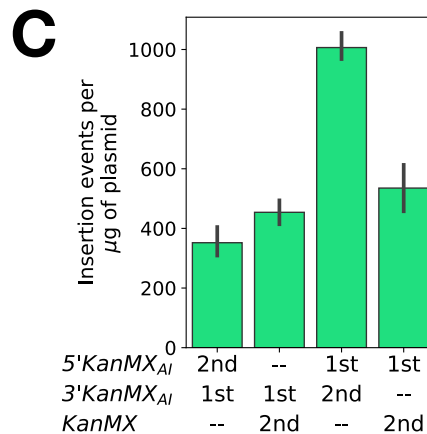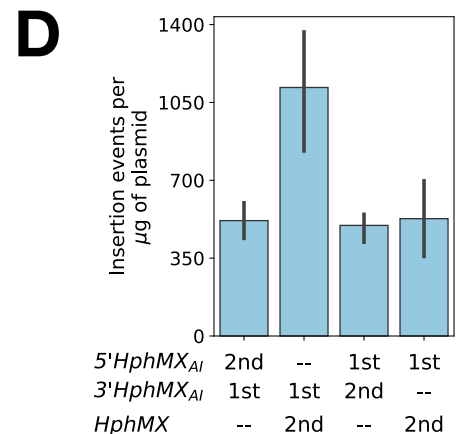

**Figure S2. Related to Figure 1.**

(A) Barcoded plasmids containing various size of inserts were pooled and integrated into yeast at the lox5171 site. Violin plots shows the distribution of barcode counts for each plasmid size. Each plasmid size contains at least 6,000 double barcodes. The width of each violin is fixed and violin areas are not proportional to the number of barcodes.

(B-D). Number of insertion events from transformations into yeast containing either 5' or 3' half of *NatMX<sub>AI</sub>* (B), *KanMX<sub>AI</sub>* (C), or *HphMX<sub>AI</sub>* (D) with plasmids containing either a full or half marker. 1st and 2nd indicates the order in which markers are inserted into the landing pad.

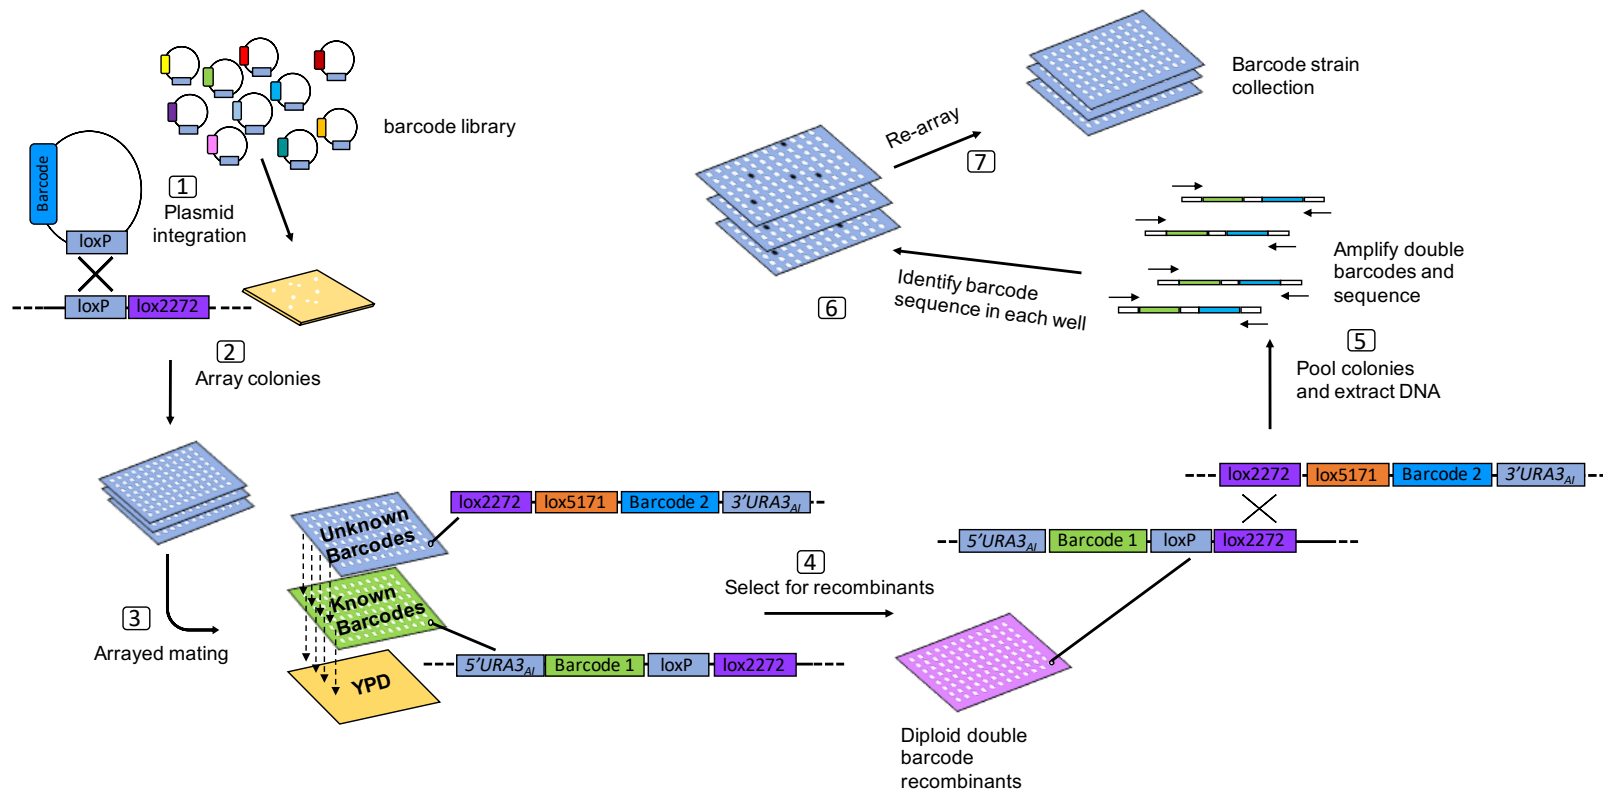

**Figure S3. Related to Figure 2.** REcombination-Directed Indexing (REDI) of complex yeast libraries. (1) Barcode plasmid libraries are integrated into the yeast genome at the landing pad locus via *Cre-loxP* recombination. (2) Successful transformants are picked and arrayed into multi-well plates. (3) Each transformant (containing an unknown barcode) mates with at least one strain containing a known barcode on YPD. (4) Recombination between homologous chromosome arms is induced and double barcode recombinants are selected. (5) Recombinants are pooled, genomic DNA is isolated, and double barcodes are PCR amplified and sequenced. (6) The known barcode sequence identifies the unknown barcode partner in each double barcode read. (7) After filtering out duplicate barcodes or wells that contain multiple unknown barcodes, each barcode is re-arrayed to form an arrayed strain collection.

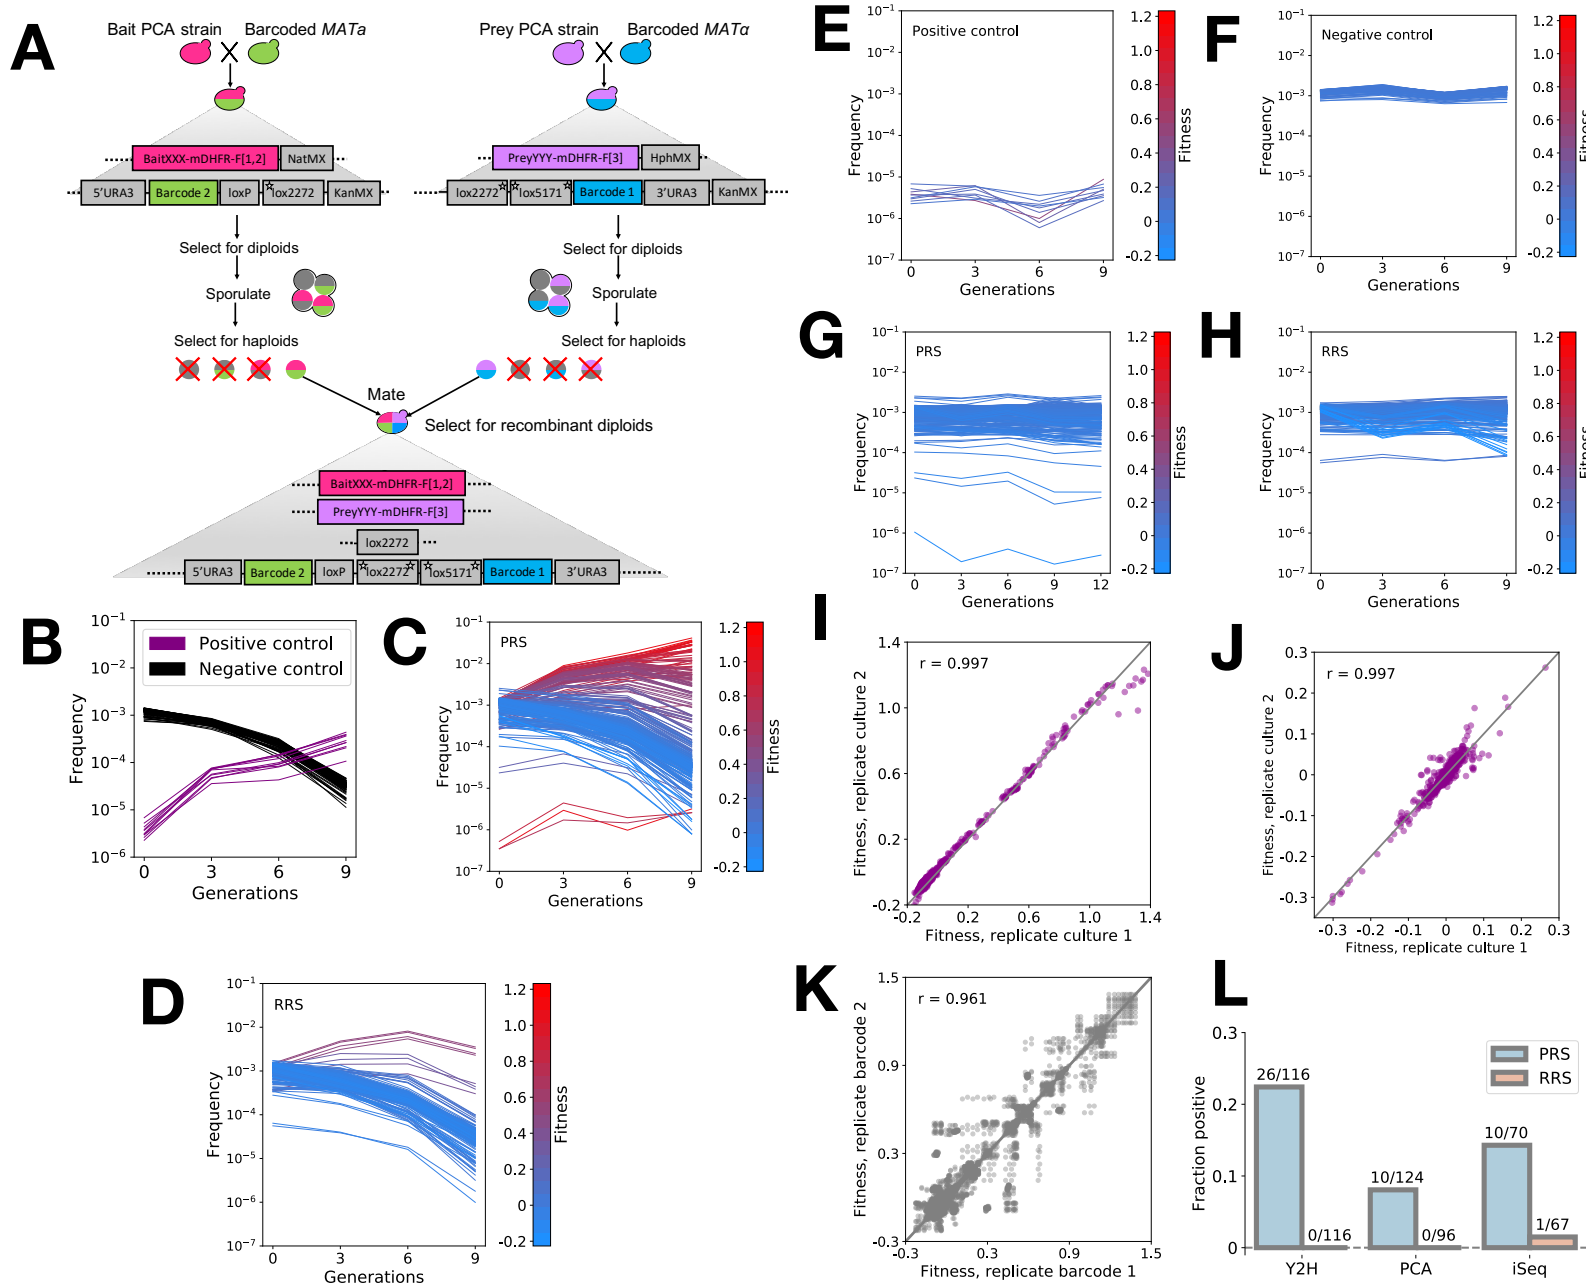

**Figure S4. Related to Figure 2. Lineage trajectories of protein-protein interaction strains.**

(A) Strains from the double barcoder collection (generated here) are pairwise mated to PCA strains from the protein interactome collection (Tarassov *et al*, 2008) and the resulting diploids are sporulated. Haploids of a specific mating type containing both the barcode and the PCA construct are selected for using a dual-SGA reporter (Tong *et al*, 2004), and selectable marker adjacent to the PCA construct and barcode. *MATa* and *MATa* haploids are mated in pairs. Recombination is induced in diploids to bring the two barcodes to the same chromosome and reconstitute the split *URA3* selectable marker. Barcoded positive (+mDHFR) and negative (-mDHFR) control strains are generated separately and spiked into the pool prior to competitive growth.

(B-D) Lineage trajectories of spiked-in positive (purple, 10 replicates) and negative (black, 100 replicates) control strains (B), and a set of 70 positive reference protein pairs (C, PRS) and 67 random reference protein pairs (D, RRS), each with 2-8 barcode replicates (Yu *et al*, 2008). Color for the PRS and RRS trajectories is the estimated fitness.

(E-H) Lineage trajectories of the absence of methotrexate of 10 mDHFR+ positive control strains (E), 100 mDHFR- negative control strains (F), 69 positive reference protein pairs, PRS (G), and 67 random reference protein pairs, RRS (H). Each strain has 2-8 barcode replicates. Color of each trajectory indicates the estimated fitness.

(I) Scatter plot of the estimated fitnesses from replicate growth cultures in the presence of methotrexate (Pearson's  $r = 0.997$ ).

(J) Scatter plot of the estimated fitnesses from replicate growth cultures in the absence of methotrexate (Pearson's  $r = 0.997$ ).

(K) Scatter plot of the estimated fitnesses from replicate barcodes within a single culture that mark the same protein pair (Pearson's  $r = 0.961$ ).

(L) Bar plot of the fraction of PRS and RRS protein pairs called as a PPI by yeast two-hybrid (Yu *et al*, 2008), traditional PCA (Tarassov *et al*, 2008), and iSeq. These values are rough estimates for the true positive and false positive rates of each assay, respectively.

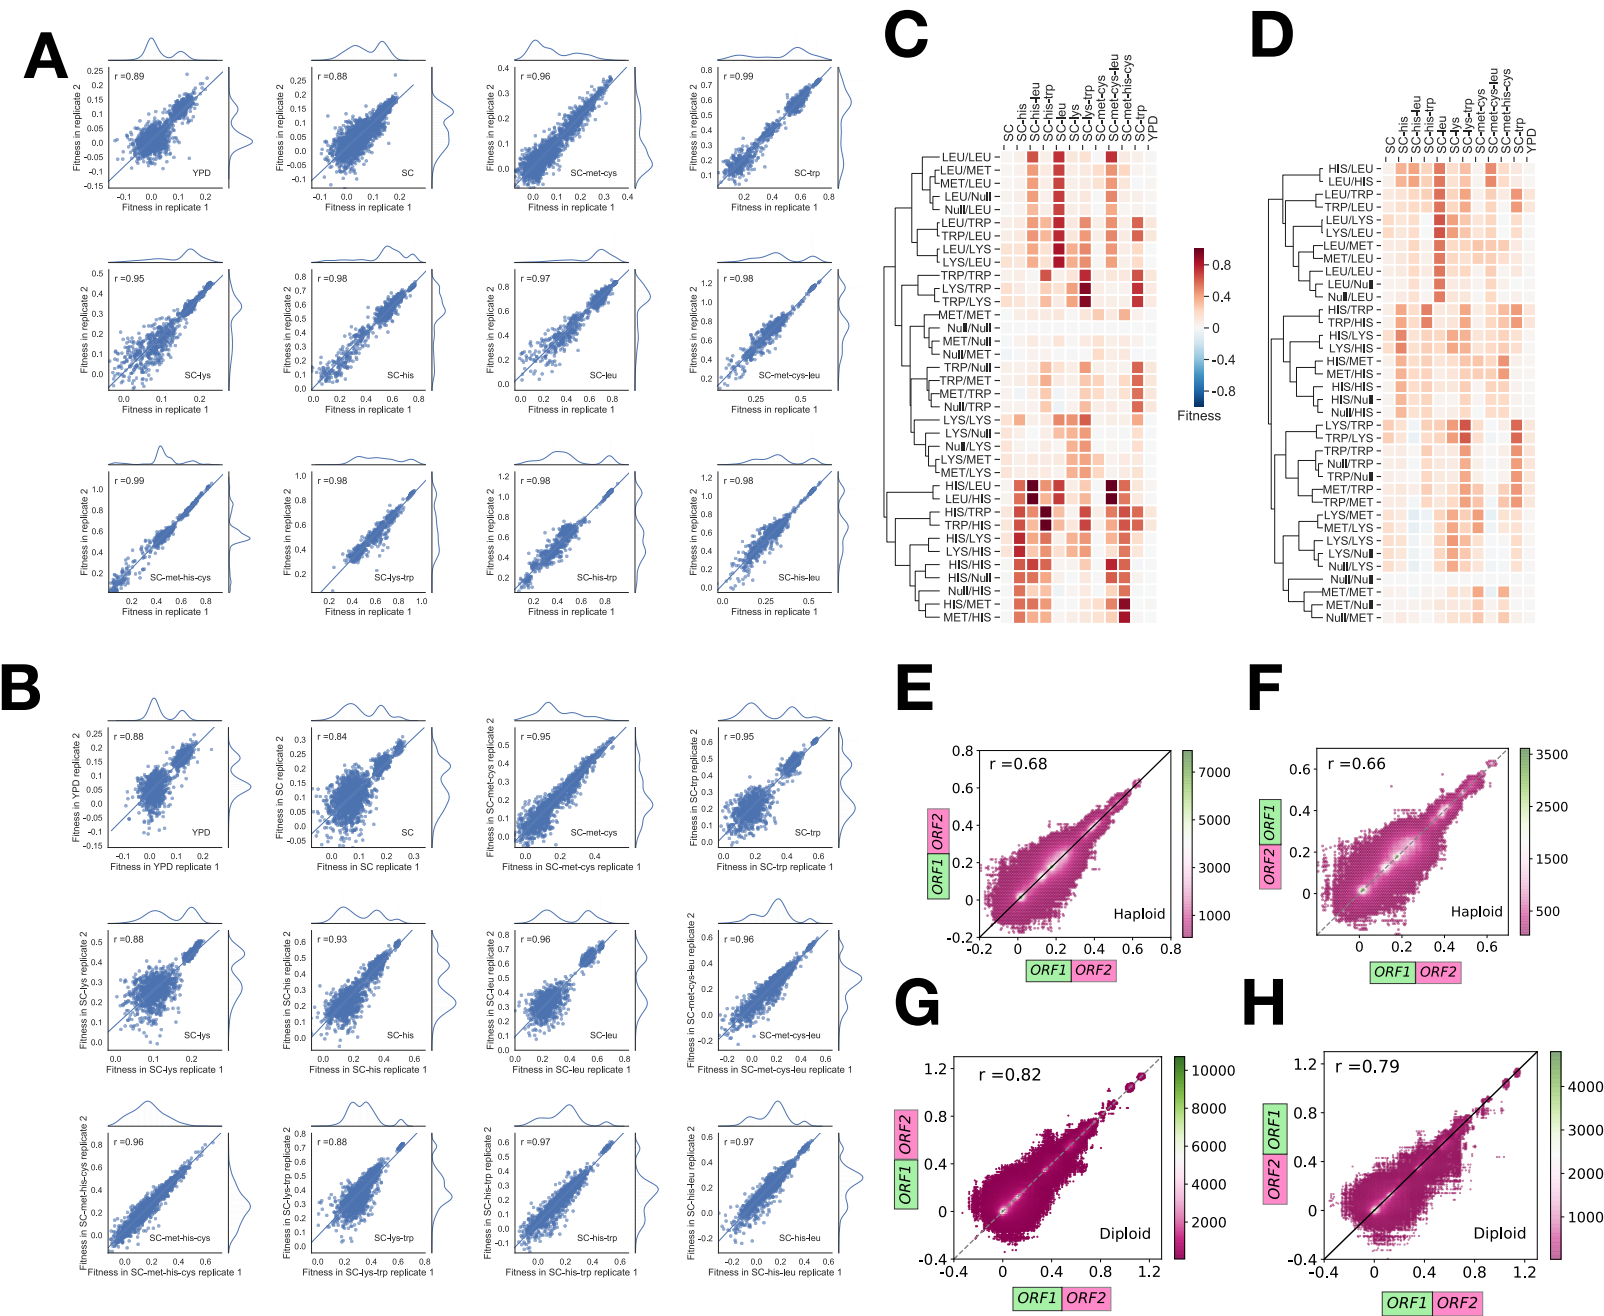

**Figure S5. Related to Figure 2.**

**(A-B)** Scatter plots of fitnesses estimated from replicate cultures in all 12 growth conditions for diploid (A) and haploid (B) libraries.  $r$  is the Pearson correlation coefficient.

**(C-D)** Heatmaps of the mean estimated fitness in diploid (C) and haploid (D) cells of each ORF pair in 12 growth conditions. Dendrograms are from hierarchical clustering.

**(E-F)** Hexmaps of fitnesses between yeast strains that carry different double barcodes but the same combination of ORFs for haploid libraries. Comparisons are within the same culture and between ORF pairs that are integrated at the iSeq landing pad in the same (E) or opposite (F) orientations

**(G-H)** Hexmaps of fitnesses between yeast strains that carry different double barcodes but the same combination of ORFs for diploid libraries. Comparisons are within the same culture and between ORF pairs that are integrated at the iSeq landing pad in the same (G) or opposite (H) orientations.

**Table S1. Related to Figure 1. Sequences of loxP variants used in this study.**

| loxP variant | Spacer (5' - 3') | Left inverted repeat sequence | Right inverted repeat sequence |
|--------------|------------------|-------------------------------|--------------------------------|
| loxP         | ATAACTTCGTATA    | ATGTATGC                      | TATACGAAGTTAT                  |
| lox71        | taccgTTCGTATA    | ATGTATGC                      | TATACGAAGTTAT                  |
| lox66        | ATAACTTCGTATA    | ATGTATGC                      | TATACGAAcggta                  |
| lox5171      | ATAACTTCGTATA    | ATGTgTaC                      | TATACGAAGTTAT                  |
| lox5171/71   | taccgTTCGTATA    | ATGTgTaC                      | TATACGAAGTTAT                  |
| lox5171/66   | ATAACTTCGTATA    | ATGTgTaC                      | TATACGAAcggta                  |
| lox2272      | ATAACTTCGTATA    | AaGTATcC                      | TATACGAAGTTAT                  |
| lox2272/71   | taccgTTCGTATA    | AaGTATcC                      | TATACGAAGTTAT                  |
| lox2272/66   | ATAACTTCGTATA    | AaGTATcC                      | TATACGAAcggta                  |

**Table S2. Related to Figure 2. Barcoded plasmid libraries.**

| Plasmid library | loxP variant | Full marker  | Half marker                  | Half marker exon length (bp) | Library size (x 10 <sup>6</sup> ) |
|-----------------|--------------|--------------|------------------------------|------------------------------|-----------------------------------|
| pBAR6-L1        | lox5171/66   | <i>KanMX</i> | 3' <i>URA3<sub>AI</sub></i>  | 615                          | 1.6                               |
| pBAR20-L1       | lox66        | <i>KanMX</i> | 5' <i>URA3<sub>AI</sub></i>  | 189                          | 2.8                               |
| pBAR7-L1        | lox66        | <i>HphMX</i> | 5' <i>URA3<sub>AI</sub></i>  | 189                          | 3.3                               |
| pBAR8-L1        | lox5171/66   | <i>NatMX</i> | 3' <i>KanMX<sub>AI</sub></i> | 216                          | 0.38                              |
| pBAR9-L1        | lox5171/66   | <i>NatMX</i> | 3' <i>HphMX<sub>AI</sub></i> | 453                          | 3.3                               |
| pBAR10-L1       | lox66        | <i>NatMX</i> | 5' <i>KanMX<sub>AI</sub></i> | 594                          | 3.2                               |
| pBAR11-L1       | lox66        | <i>NatMX</i> | 5' <i>HphMX<sub>AI</sub></i> | 498                          | 3.5                               |
| pBAR12-L1       | lox66        | <i>KanMX</i> | 5' <i>HphMX<sub>AI</sub></i> | 498                          | 0.64                              |
| pBAR13-L1       | lox66        | <i>KanMX</i> | 5' <i>NatMX<sub>AI</sub></i> | 192                          | 2.64                              |
| pBAR14-L1       | lox5171/66   | <i>KanMX</i> | 3' <i>HphMX<sub>AI</sub></i> | 453                          | 0.35                              |
| pBAR15-L1       | lox5171/66   | <i>KanMX</i> | 3' <i>NatMX<sub>AI</sub></i> | 381                          | 0.76                              |
| pBAR16-L1       | lox5171/66   | <i>HphMX</i> | 3' <i>NatMX<sub>AI</sub></i> | 381                          | 0.19                              |
| pBAR17-L1       | lox5171/66   | <i>HphMX</i> | 3' <i>KanMX<sub>AI</sub></i> | 216                          | 0.29                              |
| pBAR18-L1       | lox66        | <i>HphMX</i> | 5' <i>NatMX<sub>AI</sub></i> | 192                          | 1                                 |
| pBAR19-L1       | lox66        | <i>HphMX</i> | 5' <i>KanMX<sub>AI</sub></i> | 594                          | 0.12                              |

**Table S3. Related to Figure 2. Oligonucleotides used in this study.**

|                                                               |                                                                                                                                                 |
|---------------------------------------------------------------|-------------------------------------------------------------------------------------------------------------------------------------------------|
| <b>Primers for amplifying barcodes with loxP variants</b>     |                                                                                                                                                 |
| pXL005                                                        | CCAGCTGGTACCNNNNNAANNNNNNTTNNNNNTTNNNNNATAACTTCGTATAATGTATGCT                                                                                   |
| pXL006                                                        | CCAGCTGGTACCNNNNNAANNNNNNAANNNNNNTTNNNNNTTACCGTTCGTATAGTACACA                                                                                   |
| pXL296                                                        | CCAGCTAGATCTNNNNNAANNNNNNTTNNNNNTTNNNNNATAACTTCGTATAATGTATGCT                                                                                   |
| pXL297                                                        | CCAGCTGGATCCNNNNNAANNNNNNAANNNNNNTTNNNNNTACCGTTCGTATAGTACACAT                                                                                   |
| p23                                                           | GCCGAAATTGCCAGGATCAGG                                                                                                                           |
| <b>Primers for Gibson assembly ORFs into barcode plasmids</b> |                                                                                                                                                 |
| pXL094                                                        | GCCGCTTAATTAACAATTGGAGATTGTAAGTACTGAGAGTGCAC                                                                                                    |
| pXL095                                                        | gTCTAGACCTAGGCGTACGTCTGTGCGGTATTTACACACCG                                                                                                       |
| pXL096                                                        | GCCGCTTAATTAACAATTGGGGCTTCTCTTATGGCAACCG                                                                                                        |
| pXL097                                                        | gTCTAGACCTAGGCGTACGTGGAACCCTAGTGTGAATGGC                                                                                                        |
| <b>Primers for amplify fragments from human intron KCNIP4</b> |                                                                                                                                                 |
| pXL267                                                        | CCAGCTTCTAGAAatccttggacttgccattg                                                                                                                |
| pXL268                                                        | CCAGCTTCTAGAAgcttggcaccagactcact                                                                                                                |
| pXL269                                                        | CCAGCTACTAGTggatttgaatgccttctga                                                                                                                 |
| pXL270                                                        | CCAGCTACTAGTtcatcccgaccaccaataat                                                                                                                |
| pXL271                                                        | CCAGCTCAATTGGCCACACAGGAAAAAGGAAA                                                                                                                |
| pXL272                                                        | CCAGCTCAATTGCTGGCAGAAAGTAGCCAAGG                                                                                                                |
| <b>Yeast cloning</b>                                          |                                                                                                                                                 |
| pEV8                                                          | <u>GTTCTTTGCTTTTTTTTCCCCAACGACGTCGAACACATTAGTCCTACGCACTTAACTTCGCA</u>                                                                           |
| pEV9                                                          | <u>GCTTGCGCTAACTGCGAACAGAGTGCCCTATGAAATAGGGGAATGCATATCATAACGTAAT</u>                                                                            |
| p14                                                           | GCGAACAGAGTAAACCGAA                                                                                                                             |
| p15                                                           | GAAGGTCTGAAGGAGTTC                                                                                                                              |
| pXL003                                                        | <u>ATCTGTTTAGCTTGCCCTCGTCCCCGCCGGGTACCCGGCCAGCGACATGGAGATTGTAAGT</u>                                                                            |
| pXL004                                                        | <u>AACATGTTCTTTGCTTTTTTTTCCCCAACGACGTCGAACACATTAGTCCTACTGTGCGGTAT</u>                                                                           |
| pXL008                                                        | <u>AGATCTGTTTAGCTTGCCCTCGTCCCCGCCGGGTACCCGGCCAGCGACATGGTACCGTTC</u><br><u>GTATAATGTATGCTATACGAAGTTATTGCGCGGTGATCACTTATGGTACCGTTCGTATAATGTGT</u> |
| pXL043                                                        | <u>AGATCTGTTTAGCTTGCCCTCGTCCCCGCCGGGTACCCGGCCAGCGACATGGTACCGTTC</u><br><u>GTATAATGTATGCTATACGAAGTTATTGCGCGGTGATCACTTATGGTACCGTTCGTATAAAGTAT</u> |
| pXL044                                                        | <u>AGATCTGTTTAGCTTGCCCTCGTCCCCGCCGGGTACCCGGCCAGCGACATGGATAACTTC</u><br><u>GTATAAAGTATCCTATACGAACGGTATGCGCGGTGATCACTTATGGTACCGTTCGTATAATGTG</u>  |
| <b>Primers for barcoded PPI construction</b>                  |                                                                                                                                                 |
| pZL065                                                        | CGGGATCCATGGGCGGTGGCAGGATCAGGAGG                                                                                                                |
| pZL070                                                        | CCGCTCGAGTCGACACTGGATGGCAGGCGT                                                                                                                  |
| pZL071                                                        | TCAGGAGGCGGTGGGTCT                                                                                                                              |
| pZL072                                                        | CCGACTATCCAAACCATGTCTACTTTACTGGTACCCAATTCCGGTTGTTCAAT                                                                                           |
| pZL073                                                        | AGTAAAGTAGACATGGTTTGGATAGTCGG                                                                                                                   |
| pZL074                                                        | AGACCCACCGCCTCCTGA                                                                                                                              |



**Table S3 (Continued). Related to Figure 2. Oligonucleotides used in this study.**

| <b>gblocks for split drug resistant markers construction</b> |                                                                                                                                                                                                                                                                                                                                                                                                                                                                                                                                                                                                                                                                                                                                                                                                                                                                                                                                                                                                                                                                                                                                                                                                                                                                                                                                                                                                                                                                                                                                                                                                                                                                                                                                                                                                                                                                                                                                                                                                                                                                                                                                                                                    |
|--------------------------------------------------------------|------------------------------------------------------------------------------------------------------------------------------------------------------------------------------------------------------------------------------------------------------------------------------------------------------------------------------------------------------------------------------------------------------------------------------------------------------------------------------------------------------------------------------------------------------------------------------------------------------------------------------------------------------------------------------------------------------------------------------------------------------------------------------------------------------------------------------------------------------------------------------------------------------------------------------------------------------------------------------------------------------------------------------------------------------------------------------------------------------------------------------------------------------------------------------------------------------------------------------------------------------------------------------------------------------------------------------------------------------------------------------------------------------------------------------------------------------------------------------------------------------------------------------------------------------------------------------------------------------------------------------------------------------------------------------------------------------------------------------------------------------------------------------------------------------------------------------------------------------------------------------------------------------------------------------------------------------------------------------------------------------------------------------------------------------------------------------------------------------------------------------------------------------------------------------------|
| 5'HphMX                                                      | CCAGCTCCATGTCGCTGGCCGGGTGACCGATTTCGGTAATCTCCGAACAGAGTCTTGACGTGCGCAGCTCAGGGGCATGATGTGACTGTGCGCCGTACATTTAGCCCATACATCCCCATGTATAATCATTGTCATCCATACATTTTGATGGCCGCACGGCGCGAAGCAAAAATTACGGCTCCTCGCTGCAGACCTGCGAGCAGGGAAACGCTCCCCTCACAGACGCGTTGAATTGTCCCCACGCGCGCCCTGTAGAGAAATATAAAAGGTTAGGATTTGCCACTGAGGTTCTTCTTTTCATATACTTCTTTTAAAATCTTGCTAGGATACAGTTCTCACATCACATCCGAACATAAAACAACATGGGTAAAAAGCCTGAACTCACCGCAGCTGTGCGAGAAGTTCTGATCGAAAAGTTTCGACACGCTCTCCGACCTGATGCAGCTCTCGGAGGGCGAAGAATCTCGTGCTTTTCAGCTTCGATGTAGGAGGGCGTGGATATGTCTGCGGGTAAATAGCTGCGCCGATGGTTTCTACAAAGATCGTTATGTTTATCGGCACTTTGATCGGCCCGCTCCCATTCCGGAAGTGTGATGACATTGGGGAAATTCAGCGAGAGCCTGACCTATTGCATCTCCCGCCGTGCACAGGGTGTACGTTGCAAGACCTGCCTGAAACCGAACTGCCCGCTGTTCTGCAGCCGGTTCGCGGAGGCCATGGATGCGATCGCTGCGGCCGATTTAGCCAGACGAGCGGGTTCGGCCCATCGGACCCGCAAGGAATCGGTCAATACACTACATGCGCTGATTTTCATATGCGCGATTTGCTGATCCCCATGTGTATCACTGGCAAACCTGTGATGGACGACACCCGTCAGTGCCTCCGTCGCGAGGTAAGTGTAAATATGGACTAAAGGAGGCTTTTGTGACGGATCCGATATCGGTACCCCTCTGCTTAAAGGGCGCGCCAGCTGGCCAGCTGGCGCCCTTAAAGCAGGAGGGTACCGATATCAGATCTAAGCTTGAATTCGAATTTTACTAACAATGGTATTATTTATAAcagGCTCTCGATGAGCTGATGCTTTGGGCCGAGGACTGCCCCGAAGTCCGGCACCTCGTGCACGCGGATTTCCGGCTCCAACAATGTCTGACGGACAATGGCCGCATAACAGCGGTATTGACTGGAGCGAGGCGATGTTCCGGGGATTTCCCAATACGAGGTCGCCAACATCTTCTTCTGGAGGCCGTGGTGTGATGGAGCAGCAGACGCGCTACTTCCGAGCGGAGGCATCCGGAGCTTGCAGGATCGCCGCGGCTCCGGCGGTATATGCTCCGATTTGGCTTTGACCAACTCTATCAGAGCTTGGTTCAGGCAATTTTCGATGATGCAGCTTGGGCGCAGGGTTCGATGCGACGCAATCGTCCGATCCGGAGCCGGGACTGTGCGGGCGTACACAAATCGCCCGCAGAAAGCGCGGCCGTCTGGACCGATGGCTGTGTAGAAGTACTCGCCGATAGTGGAAACCGACGCCCCAGCACTCGTCCGAGGGCAAAGGAATAATCAGTACTGACAATAAAAAGATTCTTGTTTTCAAGAACTTGTCATTTGTATAGTTTTTTATATTGTAGTGTCTATTTAATCAAATGTTAGCTGATTTATTTTTTTCGCCTCGACATCATCGCCAGATGCGAA GTTAAGTGTGCGAGAAGTAATATCATGCTCAATCGTATGTAATGCTGGTCTGCTATACTGTGTCGATCTGATACTGATAACGCCTCCAGTGTGCGAAAACGAGCTCCATTAAGTGTGTAATCTGCTATACTCTCTATAATAGCAGTTTTTCTACTGAAATCCAGGAAAGGTAATAAACTCAGATTTTTTTTTTATACTATTGGCTGCTTGTACTTATATATCTTGAACCTTCTCCAGCGGGTCTCAATAACATTTGGGCGATGTTTCATGTTTCATTAGGCAGGTAATTCGACATTGATCACACGCGAAAAACCGCCGGAATTTTATGTAATTGCAAGTGAATTCGGCTGGCAAACCTATTGGGCCCGTACCCCGaccGGTACCCCGCCAGCGACATGGAGCTGG |
| 3'HphMX                                                      | CCAGCTGGCGCCCTTAAAGCAGGAGGGTACCGATATCAGATCTAAGCTTGAATTCGAATTTTACTAACAATGGTATTATTTATAAcagcttgataacctttttgacgaggggaaataataggttgatgattggtgacgagctggaatcgacagccgataccaggatctgccaactctatggaactgcctcggtgagtttctcctcattacagaacggcttttcaaaaataggtattgataactctgatagaataatgcagtttctttagtctcagatgattttctaaTCAGTACTGACAATAAAAAGATCTTTGTTTTCAAGAACTTGTCAATTTGTATAGTTTTTTATATTGTAGTTGTTCTATTTTAACTCAAATGTTAGCTGATTTATTTTTTTCGCCTCGACATCATCTGCCAGATGCGAAGTAAAGTGGCAGAAAGTAATATCATGCGTCAATCGTATGTGAATGCTGGTCTGATACTGCTGATCTGATACTAACGCCGCCATCCAGTGTGCGAAAACGAGCTCCATTAGTGTAGTAATCTGTGATATCTCTATAATAGCAGTTTTTCACTGAAATCCAGGAAAGGTAATAAACTCAGATTTTTTTTTTATACTATTGGCTGCTTGTACTTATATATCTTGAACCTTCTCCAGCGGGTCTTCAAATAACATTTGGGCGATGTTTCATGTTTCATTAGGCAGGTAATTCGACATTGATCACACGCGAAAAACCGCCGGAATTTTATGTAATTGCAAGTGAATTCGGCTGGCAAACCTATTGGGCCCGTACCCCGaccGGTACCCCGCCAGCGACATGGAGCTGG                                                                                                                                                                                                                                                                                                                                                                                                                                                                                                                                                                                                                                                                                                                                                                                                                                                                                                                                                                                                                                                                                                                                                                                                                                                                                                                       |
| 5'KanMX                                                      | CCAGCTCCATGTCGCTGGCCGGGTGACCGATTTCGGTAATCTCCGAACAGAGTCTTGACGTGCGCAGCTCAGGGGCATGATGTGCGCAGCTCAGGGGCATGATGTGACTGTGCGCCGTACATTTAGCCCATACATCCCCATGTATAATCATTGTCATCCATACATTTTGATGGCCGCACGGCGCGAAGCAAAAATTACGGCTCCTCGCTGCAGACCTGCGAGCAGGGAAACGCTCCCCTCACAGACGCGTTGAATTGTCCCCACGCGCGCCCTGTAGAGAAATATAAAAGGTTAGGATTTGCCACTGAGGTTCTTCTTTTCATATACTTCTTTTAAAATCTTGCTAGGATACAGTTCTCACATCACATCCGAACATAAAACAACatgggtaaggaagactcacgtttcgaggccgcgattaaatccaacatggatgctgattataggatgataatgggctcgcgataatgctgggcaatcaggtgcaacatctatcgattgtatgggaagccgatgcgagcaggtgtttcgaacatggcaaggtgagctggccaatgatttacagatgagatgctcagactaacctggctgacggaattatgctctccgaccatcaagcattttacgctactctgatgatgctgattactaccactcgatccccggcaaacagcattccaggtattagaagaataatcgtattcaggtgaaaatattgtgatcgctggcagtgcttctgcccgggtgcaactgactctgtttgtaattgctctttaaaccgagcgcgatttctgctcagcgcaatcagatgaataacggtttgggtgagctgattttgatgacgagcgaatggctggcctgtggaacagctctggaagaaatgataagctttgccaactcaccggattcagctgctcactcaggtatttctcagtaTGTAAATATGGACTAAAGGAGGCTTTTGTGACGGATCCGATATCGGTACCCCTCTGCTTAAAGGGCGCGCCAGCTGG                                                                                                                                                                                                                                                                                                                                                                                                                                                                                                                                                                                                                                                                                                                                                                                                                                                                                                                                                                                                                                                                                                                              |
| 3'KanMX                                                      | CCAGCTGGCGCCCTTAAAGCAGGAGGGTACCGATATCAGATCTAAGCTTGAATTCGAATTTTACTAACAATGGTATTATTTATAAcagcttgataacctttttgacgaggggaaataataggttgatgattggtgacgagctggaatcgacagccgataccaggatctgccaactctatggaactgcctcggtgagtttctcctcattacagaacggcttttcaaaaataggtattgataactctgatagaataatgcagtttctttagtctcagatgattttctaaTCAGTACTGACAATAAAAAGATCTTTGTTTTCAAGAACTTGTCAATTTGTATAGTTTTTTATATTGTAGTTGTTCTATTTTAACTCAAATGTTAGCTGATTTATTTTTTTCGCCTCGACATCATCTGCCAGATGCGAAGTAAAGTGGCAGAAAGTAATATCATGCGTCAATCGTATGTGAATGCTGGTCTGATACTGCTGCTGATCTGATACTAACGCCGCCATCCAGTGTGCGAAAACGAGCTCCATTAGTGTAGTAATCTGTGATATCTCTATAATAGCAGTTTTTCACTGAAATCCAGGAAAGGTAATAAACTCAGATTTTTTTTTTATACTATTGGCTGCTTGTACTTATATATCTTGAACCTTCTCCAGCGGGTCTTCAAATAACATTTGGGCGATGTTTCATGTTTCATTAGGCAGGTAATTCGACATTGATCACACGCGAAAAACCGCCGGAATTTTATGTAATTGCAAGTGAATTCGGCTGGCAAACCTATTGGGCCCGTACCCCGaccGGTACCCCGCCAGCGACATGGAGCTGG                                                                                                                                                                                                                                                                                                                                                                                                                                                                                                                                                                                                                                                                                                                                                                                                                                                                                                                                                                                                                                                                                                                                                                                                                                                                                                                    |
| 5'NatMX                                                      | CCAGCTCCATGTCGCTGGCCGGGTGACCGATTTCGGTAATCTCCGAACAGAGGCCCAGAATACCCTCCTTGACAGTCTTGACGTGCGCAGCTCAGGGGCATGATGTGACTGTGCGCCGTACATTTAGCCCATACATCCCCATGTATAATCATTGTCATCCATACATTTTGATGGCCGCACGGCGCGAAGCAAAAATTACGGCTCCTCGCTGCAGACCTGCGAGCAGGGAAACGCTCCCCTCACAGACGCGTTGAATGTCCCCACGCGCCCTGTAGAGAAATATAAAAGGTTAGGATTTGCCACTGAGGTTCTTCTTTTCATACTCTCTTTAAAATCTTGCTAGGATTTCTAGCTAGGATCTCTCACATCCGAACATAAAACAACATGGGTAAAAAGCCTGAACTCACCGCAGCTGTGCGAGAAGTTCTGATCGAAAAGTTTCGACACGCTCTCCGACCTGATGCAGCTCTCGGAGGGCGAAGAATCTCGTGCTTTTCAGCTTCGATGTAGGAGGGCGTGGATATGTCTGCGGGTAAATAGCTGCGCCGATGTTTTCAGCTTCTCCGACCTGACCGCCACCGGGGACGGCTTACCCTGCGGGAGGTGCCGGTGGACCCGCCCTGACCAAGGTGTTCCCGACGACGAAgtaTGTTAATATGGACTAAAGGAGGCTTTTGTGACGGATCCGATATCGGTACCCCTCTGCTTAAAGGGCGCGCCAGCTGG                                                                                                                                                                                                                                                                                                                                                                                                                                                                                                                                                                                                                                                                                                                                                                                                                                                                                                                                                                                                                                                                                                                                                                                                                                                                                                                                                                                                                             |
| 3'NatMX                                                      | CCAGCTGGCGCCCTTAAAGCAGGAGGGTACCGATATCAGATCTAAGCTTGAATTCGAATTTTACTAACAATGGTATTATTTATAAcagTCGGACGACGAATCGGACGAGGGGAGGACGGCGACCCGACTCCCGACGTTTCGTCGCGTACGGGGACGACGGCGACTGGCGGGCTTCGTGGTCTCGTACTCCGGCTGGAACCGCCGCTGACCGTTCGAGGACATCGAGGTGCGCCCGGAGCACCGGGGACGGGGTTCGGGCGCGCTTGTATGGGGTTCGCGACGGAGTTCGCCCCGAGCGGGGCGCCGGGACCTCTGGCTGGAGGTCACCAACGTCAACGCACCGGCGATCCACGCGTACCGGCGATGGGGTTCACCCTCTGCGGCCTGACACCGCCCTGTACGACGCGACCGCCTCGGACGGCGAGCAGGCGCTCTACATGAGCATGCCCTGCCCTAATCAGTACTGACAATAAAAAGATTTCTTGTTTTCAAGAACTTGTCAATTTGTATAGTTTTTTTTTATATTGTAGTTGTTCTATTTTAACTCAAATGTTAGCTGATTTATTTTTTTCGCCTCGACATCATCTGCCAGATGCGAAGTAAAGTGGCAGAAAGTAATATCATGCGTCAATCGTATGTGAATGCTGGTCTGATACTGCTGCTGATCTGATACTAACGCCGCCATCCAGTGTGCGAAAACGAGCTCCATTAGTGTAGTAATCTGTGATATCTCTATAATAGCAGTTTTTCACTGAAATCCAGGAAAGGTAATAAACTCAGATTTTTTTTTTATACTATTGGCTGCTTGTACTTATATATCTTGAACCTTCTCCAGCGGGTCTTCAAATAACATTTGGGCGATGTTTCATGTTTCATTAGGCAGGTAATTCGACATTGATCACACGCGAAAAACCGCCGGAATTTTATGTAATTGCAAGTGAATTCGGCTGGCAAACCTATTGGGCCCGTACCCCGaccGGTACCCCGCCAGCGACATGGAGCTGG                                                                                                                                                                                                                                                                                                                                                                                                                                                                                                                                                                                                                                                                                                                                                                                                                                                                                                                                                                                                                                                                                                                                      |

**Table S3 (Continued). Related to Figure 2. Oligonucleotides used in this study.**

| <b>Forward primers for EVO1 cycle</b> |                                                                                |
|---------------------------------------|--------------------------------------------------------------------------------|
| P104                                  | ACACTCTTTCCCTACACGACGCTCTTCCGATCTNNNNNNNNCGATGTTAATATGGACTAAAGGAGGCTTTT        |
| P105                                  | ACACTCTTTCCCTACACGACGCTCTTCCGATCTNNNNNNNNACAGTGTTAATATGGACTAAAGGAGGCTTTT       |
| P111                                  | ACACTCTTTCCCTACACGACGCTCTTCCGATCTNNNNNNNNNTGACCATTAATATGGACTAAAGGAGGCTTTT      |
| P112                                  | ACACTCTTTCCCTACACGACGCTCTTCCGATCTNNNNNNNNNGCCAATTTAATATGGACTAAAGGAGGCTTTT      |
| P122                                  | ACACTCTTTCCCTACACGACGCTCTTCCGATCTNNNNNNNNNATCACGTTAATATGGACTAAAGGAGGCTTTT      |
| P124                                  | ACACTCTTTCCCTACACGACGCTCTTCCGATCTNNNNNNNNNGGCTACTTAATATGGACTAAAGGAGGCTTTT      |
| P125                                  | ACACTCTTTCCCTACACGACGCTCTTCCGATCTNNNNNNNNNTAGCTTTAATATGGACTAAAGGAGGCTTTT       |
| P130                                  | ACACTCTTTCCCTACACGACGCTCTTCCGATCTNNNNNNNNNTCTCCCTAATATGGACTAAAGGAGGCTTTT       |
| P131                                  | ACACTCTTTCCCTACACGACGCTCTTCCGATCTNNNNNNNNNGACGCTTAATATGGACTAAAGGAGGCTTTT       |
| P132                                  | ACACTCTTTCCCTACACGACGCTCTTCCGATCTNNNNNNNNNGAGGTTTAAATATGGACTAAAGGAGGCTTTT      |
| P135                                  | ACACTCTTTCCCTACACGACGCTCTTCCGATCTNNNNNNNNNGTTAACTTAATATGGACTAAAGGAGGCTTTT      |
| P137                                  | ACACTCTTTCCCTACACGACGCTCTTCCGATCTNNNNNNNNNAACCACTTAATATGGACTAAAGGAGGCTTTT      |
| P201                                  | ACACTCTTTCCCTACACGACGCTCTTCCGATCTNNNNNNNNNGCTTGATTAATATGGACTAAAGGAGGCTTTT      |
| P202                                  | ACACTCTTTCCCTACACGACGCTCTTCCGATCTNNNNNNNNNCAAGAATTAATATGGACTAAAGGAGGCTTTT      |
| P203                                  | ACACTCTTTCCCTACACGACGCTCTTCCGATCTNNNNNNNNNATGCGATTAATATGGACTAAAGGAGGCTTTT      |
| P204                                  | ACACTCTTTCCCTACACGACGCTCTTCCGATCTNNNNNNNNNCATAGGTTAATATGGACTAAAGGAGGCTTTT      |
| P205                                  | ACACTCTTTCCCTACACGACGCTCTTCCGATCTNNNNNNNNNTTTTGTTAATATGGACTAAAGGAGGCTTTT       |
| P206                                  | ACACTCTTTCCCTACACGACGCTCTTCCGATCTNNNNNNNNNTGGAAGTTAATATGGACTAAAGGAGGCTTTT      |
| P207                                  | ACACTCTTTCCCTACACGACGCTCTTCCGATCTNNNNNNNNNCCGGGCTTAATATGGACTAAAGGAGGCTTTT      |
| P208                                  | ACACTCTTTCCCTACACGACGCTCTTCCGATCTNNNNNNNNNCTACTCTTAATATGGACTAAAGGAGGCTTTT      |
| P209                                  | ACACTCTTTCCCTACACGACGCTCTTCCGATCTNNNNNNNNNAGTGATTAATATGGACTAAAGGAGGCTTTT       |
| P210                                  | ACACTCTTTCCCTACACGACGCTCTTCCGATCTNNNNNNNNNTTCGGTTAATATGGACTAAAGGAGGCTTTT       |
| P211                                  | ACACTCTTTCCCTACACGACGCTCTTCCGATCTNNNNNNNNNGAATCGTTAATATGGACTAAAGGAGGCTTTT      |
| P212                                  | ACACTCTTTCCCTACACGACGCTCTTCCGATCTNNNNNNNNNCGCATATTAATATGGACTAAAGGAGGCTTTT      |
| <b>Reverse primers for EVO1 cycle</b> |                                                                                |
| P101                                  | CTCGGCATTCCCTGCTGAACCGCTCTTCCGATCTNNNNNNNNNTATATACGCTCGAATTCAAGCTTAGATCTGATA   |
| P108                                  | CTCGGCATTCCCTGCTGAACCGCTCTTCCGATCTNNNNNNNNNCGCTCTATCTCGAATTCAAGCTTAGATCTGATA   |
| P109                                  | CTCGGCATTCCCTGCTGAACCGCTCTTCCGATCTNNNNNNNNNGAGACGCTTTCGAATTCAAGCTTAGATCTGATA   |
| P110                                  | CTCGGCATTCCCTGCTGAACCGCTCTTCCGATCTNNNNNNNNNATACTGCGTTTCGAATTCAAGCTTAGATCTGATA  |
| P126                                  | CTCGGCATTCCCTGCTGAACCGCTCTTCCGATCTNNNNNNNNNACTAGCAGATCGAATTCAAGCTTAGATCTGATA   |
| P127                                  | CTCGGCATTCCCTGCTGAACCGCTCTTCCGATCTNNNNNNNNNTGAGCTAGCTCGAATTCAAGCTTAGATCTGATA   |
| P128                                  | CTCGGCATTCCCTGCTGAACCGCTCTTCCGATCTNNNNNNNNNCTGCTACTCTCGAATTCAAGCTTAGATCTGATA   |
| P129                                  | CTCGGCATTCCCTGCTGAACCGCTCTTCCGATCTNNNNNNNNNCGGTACGATCGAATTCAAGCTTAGATCTGATA    |
| P133                                  | CTCGGCATTCCCTGCTGAACCGCTCTTCCGATCTNNNNNNNNNCTCTCCGCTCGAATTCAAGCTTAGATCTGATA    |
| P134                                  | CTCGGCATTCCCTGCTGAACCGCTCTTCCGATCTNNNNNNNNNTAATCCTCTCGAATTCAAGCTTAGATCTGATA    |
| P136                                  | CTCGGCATTCCCTGCTGAACCGCTCTTCCGATCTNNNNNNNNNATCCGAGTATCGAATTCAAGCTTAGATCTGATA   |
| P138                                  | CTCGGCATTCCCTGCTGAACCGCTCTTCCGATCTNNNNNNNNNCCGTACACATCGAATTCAAGCTTAGATCTGATA   |
| P213                                  | CTCGGCATTCCCTGCTGAACCGCTCTTCCGATCTNNNNNNNNNCTTCTCAAATCGAATTCAAGCTTAGATCTGATA   |
| P214                                  | CTCGGCATTCCCTGCTGAACCGCTCTTCCGATCTNNNNNNNNNAGGGTTTATTTCGAATTCAAGCTTAGATCTGATA  |
| P215                                  | CTCGGCATTCCCTGCTGAACCGCTCTTCCGATCTNNNNNNNNNNGCGTCCGTTTCGAATTCAAGCTTAGATCTGATA  |
| P216                                  | CTCGGCATTCCCTGCTGAACCGCTCTTCCGATCTNNNNNNNNNGTATTGTAATCGAATTCAAGCTTAGATCTGATA   |
| P217                                  | CTCGGCATTCCCTGCTGAACCGCTCTTCCGATCTNNNNNNNNNCGCGCTTTCGAATTCAAGCTTAGATCTGATA     |
| P218                                  | CTCGGCATTCCCTGCTGAACCGCTCTTCCGATCTNNNNNNNNNCGACTCTTCTCGAATTCAAGCTTAGATCTGATA   |
| P219                                  | CTCGGCATTCCCTGCTGAACCGCTCTTCCGATCTNNNNNNNNNTGTTTGAATTTCGAATTCAAGCTTAGATCTGATA  |
| P220                                  | CTCGGCATTCCCTGCTGAACCGCTCTTCCGATCTNNNNNNNNNCTGCACACTCGAATTCAAGCTTAGATCTGATA    |
| P221                                  | CTCGGCATTCCCTGCTGAACCGCTCTTCCGATCTNNNNNNNNNGATCTGCAATCGAATTCAAGCTTAGATCTGATA   |
| P222                                  | CTCGGCATTCCCTGCTGAACCGCTCTTCCGATCTNNNNNNNNNGCTTAAGGCTCGAATTCAAGCTTAGATCTGATA   |
| P223                                  | CTCGGCATTCCCTGCTGAACCGCTCTTCCGATCTNNNNNNNNNCAATGTTGATCGAATTCAAGCTTAGATCTGATA   |
| P224                                  | CTCGGCATTCCCTGCTGAACCGCTCTTCCGATCTNNNNNNNNNCAACCGACAGTTCGAATTCAAGCTTAGATCTGATA |
| <b>Primers for EVO2 cycle</b>         |                                                                                |
| pE1                                   | CAAGCAGAAGACGGCATAACGAGATCGGTCTCGGCATTCCCTGCTGAACCGCTCTTCCGATCT                |
| pE2                                   | AATGATACGGCGACCACCGAGATCTACACTCTTTCCCTACACGACGCTCTTCCGATCT                     |

**Table S4. Related to Figure 2. Plasmids used in this study.**

| Plasmids                       | Benchling link                                                                                                  |
|--------------------------------|-----------------------------------------------------------------------------------------------------------------|
| pBAR1                          | <a href="https://benchling.com/s/U6S529CV">https://benchling.com/s/U6S529CV</a>                                 |
| pBAR6                          | <a href="https://benchling.com/s/5bnewTrg">https://benchling.com/s/5bnewTrg</a>                                 |
| pBAR7                          | <a href="https://benchling.com/s/SZrma0HA">https://benchling.com/s/SZrma0HA</a>                                 |
| pBAR8                          | <a href="https://benchling.com/s/seq-Z0ihfMgQookfPNdrNUbi">https://benchling.com/s/seq-Z0ihfMgQookfPNdrNUbi</a> |
| pBAR9                          | <a href="https://benchling.com/s/seq-sZwuEZxGBuKkVqPVbMbH">https://benchling.com/s/seq-sZwuEZxGBuKkVqPVbMbH</a> |
| pBAR10                         | <a href="https://benchling.com/s/seq-nQBMZqibosBDtnvYukeg">https://benchling.com/s/seq-nQBMZqibosBDtnvYukeg</a> |
| pBAR11                         | <a href="https://benchling.com/s/seq-jn3tDL5Dms6cTcYqmMjg">https://benchling.com/s/seq-jn3tDL5Dms6cTcYqmMjg</a> |
| pBAR12                         | <a href="https://benchling.com/s/seq-mRqqVLRoABycUDiyT0rX">https://benchling.com/s/seq-mRqqVLRoABycUDiyT0rX</a> |
| pBAR13                         | <a href="https://benchling.com/s/seq-h6t5XrKxsiuWnZFFlzVl">https://benchling.com/s/seq-h6t5XrKxsiuWnZFFlzVl</a> |
| pBAR14                         | <a href="https://benchling.com/s/seq-spjmlEnVmMNZbO5H0ipI">https://benchling.com/s/seq-spjmlEnVmMNZbO5H0ipI</a> |
| pBAR15                         | <a href="https://benchling.com/s/seq-heABOqBRCBBygjE2t6Mx">https://benchling.com/s/seq-heABOqBRCBBygjE2t6Mx</a> |
| pBAR16                         | <a href="https://benchling.com/s/seq-sagZuUOEY9feDxD8boY4">https://benchling.com/s/seq-sagZuUOEY9feDxD8boY4</a> |
| pBAR17                         | <a href="https://benchling.com/s/seq-4fPJM4Ai4Uz6JHBTovrC">https://benchling.com/s/seq-4fPJM4Ai4Uz6JHBTovrC</a> |
| pBAR18                         | <a href="https://benchling.com/s/seq-0Xk4ND4Cx9gKAPNcNPCF">https://benchling.com/s/seq-0Xk4ND4Cx9gKAPNcNPCF</a> |
| BXL121                         | <a href="https://benchling.com/s/seq-TyAWiSEV1VCbCH4d57dr">https://benchling.com/s/seq-TyAWiSEV1VCbCH4d57dr</a> |
| BXL122                         | <a href="https://benchling.com/s/seq-xbtvKQuuygVIZCnmLhoX">https://benchling.com/s/seq-xbtvKQuuygVIZCnmLhoX</a> |
| BXL123                         | <a href="https://benchling.com/s/seq-dMSYSYDOLdl1J1luI62g">https://benchling.com/s/seq-dMSYSYDOLdl1J1luI62g</a> |
| BXL124                         | <a href="https://benchling.com/s/seq-ABVeiUGaSLzIKK81GPUL">https://benchling.com/s/seq-ABVeiUGaSLzIKK81GPUL</a> |
| BXL147                         | <a href="https://benchling.com/s/seq-BxdSoqpcM2EpvtIG807E">https://benchling.com/s/seq-BxdSoqpcM2EpvtIG807E</a> |
| BXL149                         | <a href="https://benchling.com/s/seq-eQI5JLEqROIwoJC2hOJ6">https://benchling.com/s/seq-eQI5JLEqROIwoJC2hOJ6</a> |
| BXL160                         | <a href="https://benchling.com/s/seq-PIE41YUcs7dP75g8Pwyj">https://benchling.com/s/seq-PIE41YUcs7dP75g8Pwyj</a> |
| BXL162                         | <a href="https://benchling.com/s/seq-PEfY1QKeB4vsexZwKJys">https://benchling.com/s/seq-PEfY1QKeB4vsexZwKJys</a> |
| BXL164                         | <a href="https://benchling.com/s/seq-u7Z5B54cvPoHzRJoz8Sy">https://benchling.com/s/seq-u7Z5B54cvPoHzRJoz8Sy</a> |
| BXL169                         | <a href="https://benchling.com/s/seq-u6rLx3wIweIUK9opIdRH">https://benchling.com/s/seq-u6rLx3wIweIUK9opIdRH</a> |
| pS413 TEFpr1-linker-DHFR-HphMX | <a href="https://benchling.com/s/seq-6HsHsJUNHIooqHVxpt9i">https://benchling.com/s/seq-6HsHsJUNHIooqHVxpt9i</a> |
| pAG32 linker-DHFR-HphMX        | <a href="https://benchling.com/s/seq-5BMVpGySmHJUiWQn7jtY">https://benchling.com/s/seq-5BMVpGySmHJUiWQn7jtY</a> |

**Table S5. Related to Figure 2. Yeast strains used in this study.**

| <b>Name</b> | <b>Genotype</b>                                                                                                                        | <b>Source</b>         | <b>identifier</b> |
|-------------|----------------------------------------------------------------------------------------------------------------------------------------|-----------------------|-------------------|
| BY4727      | <i>MATa his3Δ200 leu2Δ0 lys2Δ0 met15Δ0 trp1Δ63 ura3Δ0</i>                                                                              | ATCC                  | 200889            |
| BY4741      | <i>MATa his3Δ1 leu2Δ0 met15Δ0 ura3Δ0</i>                                                                                               | ATCC                  | 201388            |
| BY4742      | <i>MATa his3Δ1 leu2Δ0 lys2Δ0 ura3Δ0</i>                                                                                                | ATCC                  | 201389            |
| SHA319      | <i>MATa his3Δ1 leu2Δ0 lys2Δ0 ura3Δ0 ybr209w::GalCre-NatMX</i>                                                                          | Jaffe et al., 2016    | NA                |
| SHA333      | <i>MATa his3Δ1 leu2Δ0 met15Δ0 ura3Δ0 ybr209w::GalCre-NatMX</i>                                                                         | This paper            | NA                |
| SHA342      | <i>MATa his3Δ1 leu2Δ0 met15Δ0 ura3Δ0 ybr209w::GalCre-NatMX</i>                                                                         | This paper            | NA                |
| SHA349      | <i>MATa his3Δ1 leu2Δ0 lys2Δ0 ura3Δ0 ybr209w::GalCre-NatMX</i>                                                                          | Schlecht et al., 2017 | NA                |
| XLY001      | <i>MATa his3Δ1 leu2Δ0 met15Δ0 ura3Δ0 ybr209w::GalCre-URA3 can1::MFA1pr-HIS3-MFa1pr-LEU2</i>                                            | This paper            | NA                |
| XLY003      | <i>MATa his3Δ1 leu2Δ0 met15Δ0 ura3Δ0 ybr209w::GalCre-lox71-lox5171/71 can1::MFA1pr-HIS3-MFa1pr-LEU2</i>                                | This paper            | NA                |
| XLY005      | <i>MATa his3Δ1 leu2Δ0 met15Δ0 ura3Δ0 ybr209w::GalCre-lox71-lox2272/71 can1::MFA1pr-HIS3-MFa1pr-LEU2</i>                                | This paper            | NA                |
| XLY009      | <i>MATa his3Δ1 leu2Δ0 lys2Δ0 ura3Δ0 ybr209w::GalCre-URA3 can1::MFA1pr-HIS3-MFa1pr-LEU2</i>                                             | This paper            | NA                |
| XLY011      | <i>MATa his3Δ1 leu2Δ0 lys2Δ0 ura3Δ0 ybr209w::GalCre-lox2272/66-lox5171/71 can1::MFA1pr-HIS3-MFa1pr-LEU2</i>                            | This paper            | NA                |
| XLY023      | <i>MATa his3Δ1 leu2Δ0 met15Δ0 ura3Δ0 ybr209w::GalCre-lox71/66-HphMX-5'URA3-BC-loxP-lox2272/71 can1::MFA1pr-HIS3-MFa1pr-LEU2</i>        | This paper            | NA                |
| XLY024      | <i>MATa his3Δ1 leu2Δ0 lys2Δ0 ura3Δ0 ybr209w::GalCre-lox2272/66-lox5171/71/66-3'URA3-BC-KanMX-lox5171 can1::MFA1pr-HIS3-MFa1pr-LEU2</i> | This paper            | NA                |
| XLY058      | <i>MATa his3Δ1 leu2Δ0 lys2Δ0 met15Δ0 trp1Δ63 ura3Δ0 ybr209w::GalCre-lox2272/66-lox5171/71</i>                                          | This paper            | NA                |
| XLY059      | <i>MATa his3Δ1 leu2Δ0 lys2Δ0 met15Δ0 trp1Δ63 ura3Δ0 ybr209w::GalCre-lox71-lox2272/71</i>                                               | This paper            | NA                |
| XLY065      | <i>MATa his3Δ1 leu2Δ0 lys2Δ0 met15Δ0 trp1Δ63 ura3Δ0 ybr209w::GalCre-lox71-lox5171/71</i>                                               | This paper            | NA                |
| XLY082      | <i>MATa his3Δ1 leu2Δ0 met15Δ0 ura3Δ0 ybr209w::GalCre-lox71-lox5171/71/66-3'HphMX-KanMX can1::MFA1pr-HIS3-MFa1pr-LEU2</i>               | This paper            | NA                |
| XLY083      | <i>MATa his3Δ1 leu2Δ0 met15Δ0 ura3Δ0 ybr209w::GalCre-lox71-lox5171/71/66-3'NatMX-KanMX can1::MFA1pr-HIS3-MFa1pr-LEU2</i>               | This paper            | NA                |
| XLY085      | <i>MATa his3Δ1 leu2Δ0 met15Δ0 ura3Δ0 ybr209w::GalCre-lox71-lox5171/71/66-3'KanMX-HphMX can1::MFA1pr-HIS3-MFa1pr-LEU2</i>               | This paper            | NA                |
| XLY088      | <i>MATa his3Δ1 leu2Δ0 met15Δ0 ura3Δ0 ybr209w::GalCre-HphMX-loxP-5'NatMX-lox5171/71 can1::MFA1pr-HIS3-MFa1pr-LEU2</i>                   | This paper            | NA                |
| XLY089      | <i>MATa his3Δ1 leu2Δ0 met15Δ0 ura3Δ0 ybr209w::GalCre-KanMX-loxP-5'HphMX-lox5171/71 can1::MFA1pr-HIS3-MFa1pr-LEU2</i>                   | This paper            | NA                |
| XLY090      | <i>MATa his3Δ1 leu2Δ0 met15Δ0 ura3Δ0 ybr209w::GalCre-HphMX-loxP-5'KanMX-lox5171/71 can1::MFA1pr-HIS3-MFa1pr-LEU2</i>                   | This paper            | NA                |
| XLY091      | <i>MATa his3Δ1 leu2Δ0 met15Δ0 ura3Δ0 ybr209w::GalCre-lox71/66-HphMX-5'URA3-BC-loxP-lox5171/71 can1::MFA1pr-HIS3-MFa1pr-LEU2</i>        | This paper            | NA                |
| XLY092      | <i>MATa his3Δ1 leu2Δ0 met15Δ0 ura3Δ0 ybr209w::GalCre-lox71-lox5171/71/66-3'URA3-BC-KanMX-lox5171 can1::MFA1pr-HIS3-MFa1pr-</i>         | This paper            | NA                |

Note: All strains are S288C derivatives
